# Supplementary material
Source: publisher figshare collection journal article supplement (https://frontiersin.figshare.com/ndownloader/files/24058151)
Supplement: Supplementary file 1 [file 24058151]

## *Supplementary Material*

### 1 Supplementary Figures and Tables

#### 1.1 Supplementary Figure

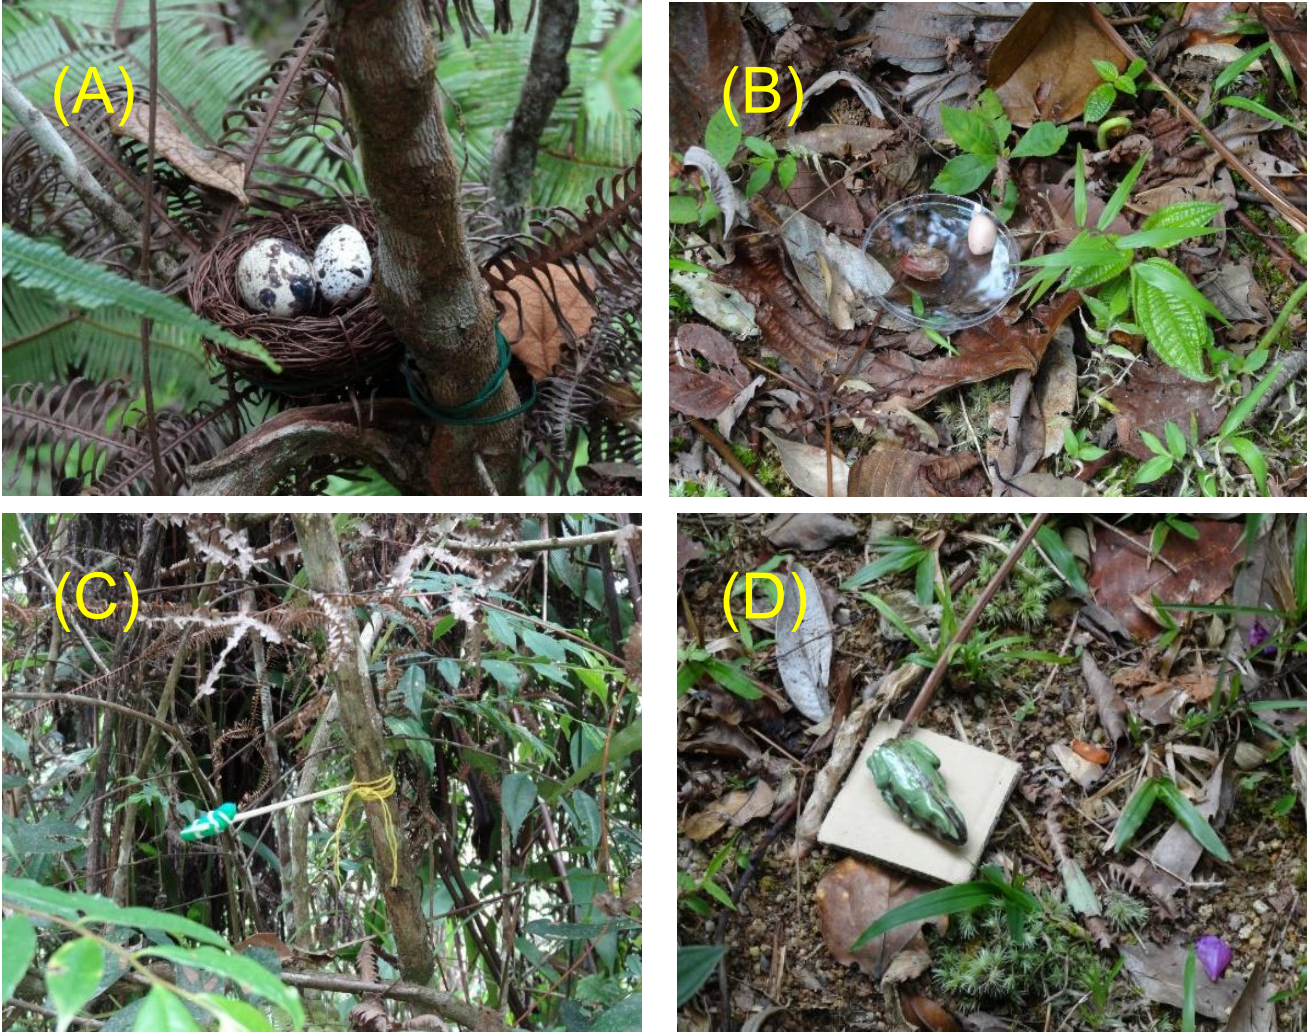

**Supplementary Figure 1.** Models and their placement in each experimental station. (A) artificial and genuine quail eggs within an artificial nest and attached 1m off the ground; (B) artificial and real cempedak seeds on a petri dish on the ground; (C) artificial caterpillar stuck 3 cm from the tip of a wooden stick and attached to at 1 m elevation from the ground; and (D) artificial frog on 6 cm × 6 cm cardboard.

## 1.2 Supplementary Tables

**Supplementary Table 1.** Correlation coefficients (rs) between vegetational structure variables, based on non-parametric Spearman's Rank multivariate correlation. Relatively strong correlations marked in bold ( $rs \geq 0.70$ ). Canopy denotes canopy cover; shrub, shrub cover; ground, ground cover; litter, leaf litter; flower, flower availability; fruit, fruit availability; sapling, trees with DBH >2 cm; dead, dead trees; understorey, understorey volume; and AGB, aboveground biomass.

|                    | Canopy      | Shrub | Ground | Litter      | Sapling | Dead | Understorey |
|--------------------|-------------|-------|--------|-------------|---------|------|-------------|
| <b>Shrub</b>       | 0.56        |       |        |             |         |      |             |
| <b>Ground</b>      | -0.45       | 0.06  |        |             |         |      |             |
| <b>Litter</b>      | <b>0.78</b> | 0.63  | -0.17  |             |         |      |             |
| <b>Sapling</b>     | <b>0.70</b> | 0.60  | -0.23  | <b>0.75</b> |         |      |             |
| <b>Dead</b>        | 0.30        | 0.19  | -0.15  | 0.23        | 0.41    |      |             |
| <b>Understorey</b> | 0.53        | 0.42  | -0.14  | 0.54        | 0.56    | 0.23 |             |
| <b>AGB</b>         | 0.66        | 0.44  | -0.15  | 0.68        | 0.64    | 0.22 | 0.41        |

**Supplementary Table 2.** Bayesian probability outputs comparing likelihood of predation between different primary forest sites for each artificial prey item type.

|              | Reference site | Probability that rate is lower at reference |                 |
|--------------|----------------|---------------------------------------------|-----------------|
|              |                | Fraser primary                              | Cameron primary |
| Nests        | Lojing primary | 78%                                         | 33%             |
|              | Fraser primary |                                             | 11%             |
| Seeds        | Lojing primary | 98%                                         | 78%             |
|              | Fraser primary |                                             | 8%              |
| Caterpillars | Lojing primary | 82%                                         | 100%            |
|              | Fraser primary |                                             | 3%              |
| Frogs        | Lojing primary | 85%                                         | 66%             |
|              | Fraser primary |                                             | 3%              |

**Supplementary Table 3.** Bayesian probability outputs comparing likelihood of predation between Cameron Highlands and Fraser’s Hill rural sites for different artificial prey item types.

| <b>Prey type</b> | <b>Probability that predation at reference (Fraser rural) is lower than Cameron rural</b> |
|------------------|-------------------------------------------------------------------------------------------|
| Nests            | 0%                                                                                        |
| Seeds            | 40%                                                                                       |
| Caterpillars     | 5%                                                                                        |
| Frogs            | 70%                                                                                       |

**Supplementary Table 4.** Bayesian probability outputs comparing likelihood of artificial nest predation across degradation gradients in Cameron Highlands and Fraser’s Hill.

|                          | Reference site<br>(primary forest) | Probability that predation is lower at reference |               |             |
|--------------------------|------------------------------------|--------------------------------------------------|---------------|-------------|
| <b>Cameron Highlands</b> | Cameron<br>primary                 | Cameron secondary                                | Cameron rural | Cameron tea |
|                          |                                    | 30%                                              | 30%           | 91%         |
| <b>Fraser's Hill</b>     | Fraser<br>primary                  | Fraser edge                                      | Fraser rural  |             |
|                          |                                    | 79%                                              | 98%           |             |

**Supplementary Table 5.** Bayesian probability outputs comparing likelihood of artificial seed predation across degradation gradients in Cameron Highlands and Fraser’s Hill.

|                          | Reference site<br>(primary forest) | Probability that predation is lower at reference |               |             |
|--------------------------|------------------------------------|--------------------------------------------------|---------------|-------------|
| <b>Cameron Highlands</b> | Cameron<br>primary                 | Cameron secondary                                | Cameron rural | Cameron tea |
|                          |                                    | 15%                                              | 10%           | 5%          |
| <b>Fraser's Hill</b>     | Fraser<br>primary                  | Fraser edge                                      | Fraser rural  |             |
|                          |                                    | 68%                                              | 1%            |             |

**Supplementary Table 6.** Bayesian probability outputs comparing likelihood of artificial caterpillar predation across degradation gradients in Cameron Highlands and Fraser’s Hill.

|                          | Reference site<br>(primary forest) | Probability that predation is lower at reference |               |             |
|--------------------------|------------------------------------|--------------------------------------------------|---------------|-------------|
| <b>Cameron Highlands</b> | Cameron<br>primary                 | Cameron secondary                                | Cameron rural | Cameron tea |
|                          |                                    | 98%                                              | 97%           | 89%         |
| <b>Fraser's Hill</b>     | Fraser<br>primary                  | Fraser edge                                      | Fraser rural  |             |
|                          |                                    | 29%                                              | 40%           |             |

**Supplementary Table 7.** Bayesian probability outputs comparing likelihood of artificial frog predation across degradation gradients in Cameron Highlands and Fraser's Hill.

|                          | Reference site<br>(primary forest) | Probability that predation is lower at reference |               |             |
|--------------------------|------------------------------------|--------------------------------------------------|---------------|-------------|
| <b>Cameron Highlands</b> | Cameron<br>primary                 | Cameron secondary                                | Cameron rural | Cameron tea |
|                          |                                    | 2%                                               | 20%           | 2%          |
| <b>Fraser's Hill</b>     | Fraser<br>Primary                  | Fraser edge                                      | Fraser rural  |             |
|                          |                                    | 30%                                              | 3%            |             |
